# Supplementary material for: An exploratory survey about using ChatGPT in education, healthcare, and research
Source: medRxiv preprint, doi:10.1101/2023.03.31.23287979, version 1 (2023-04-03)
Supplement: Supplemental Document [file 287979_file03.pdf]

# Supplemental Document

Table 1. Respondents' selections, grouped by respondent role.

|                               |                                                            |            | Grouped by<br>Role                         |                                               |                     |                     |                         |            |
|-------------------------------|------------------------------------------------------------|------------|--------------------------------------------|-----------------------------------------------|---------------------|---------------------|-------------------------|------------|
|                               |                                                            | Overall    | Medical<br>Student,<br>Resident,<br>Fellow | Graduate<br>Student,<br>Postdoc<br>Researcher | Clinical<br>Faculty | Research<br>Faculty | Administrative<br>Staff | Other      |
| <b>n</b>                      |                                                            | 420        | 14                                         | 53                                            | 45                  | 65                  | 70                      | 173        |
| <b>Used before,<br/>n (%)</b> | No                                                         | 252 (60.0) | 5 (35.7)                                   | 23 (43.4)                                     | 31 (68.9)           | 33 (50.8)           | 48 (68.6)               | 112 (64.7) |
|                               | Yes                                                        | 168 (40.0) | 9 (64.3)                                   | 30 (56.6)                                     | 14 (31.1)           | 32 (49.2)           | 22 (31.4)               | 61 (35.3)  |
| <b>Interested, n<br/>(%)</b>  | Not at all                                                 | 19 (4.5)   |                                            | 2 (3.8)                                       |                     | 5 (7.7)             | 4 (5.7)                 | 8 (4.6)    |
|                               | Very little                                                | 85 (20.2)  | 2 (14.3)                                   | 6 (11.3)                                      | 7 (15.6)            | 12 (18.5)           | 16 (22.9)               | 42 (24.3)  |
|                               | Somewhat                                                   | 209 (49.8) | 3 (21.4)                                   | 27 (50.9)                                     | 22 (48.9)           | 29 (44.6)           | 39 (55.7)               | 89 (51.4)  |
|                               | To a great<br>extent                                       | 107 (25.5) | 9 (64.3)                                   | 18 (34.0)                                     | 16 (35.6)           | 19 (29.2)           | 11 (15.7)               | 34 (19.7)  |
| <b>Education, n<br/>(%)</b>   | No, it should<br>be banned                                 | 11 (2.6)   | 1 (7.1)                                    |                                               | 1 (2.2)             | 1 (1.5)             | 2 (2.9)                 | 6 (3.5)    |
|                               | I don't know,<br>it is too early<br>to make a<br>statement | 226 (53.8) | 4 (28.6)                                   | 23 (43.4)                                     | 24 (53.3)           | 36 (55.4)           | 39 (55.7)               | 100 (57.8) |
|                               | Yes, it should<br>be actively<br>incorporated              | 183 (43.6) | 9 (64.3)                                   | 30 (56.6)                                     | 20 (44.4)           | 28 (43.1)           | 29 (41.4)               | 67 (38.7)  |

|                          |                                                    |            |           |           |           |           |           |            |
|--------------------------|----------------------------------------------------|------------|-----------|-----------|-----------|-----------|-----------|------------|
| <b>Research, n (%)</b>   | No, it should not be used at all                   | 6 (1.4)    |           |           |           | 3 (4.6)   | 1 (1.4)   | 2 (1.2)    |
|                          | I don't know, it is too early to make a statement  | 75 (17.9)  | 1 (7.1)   | 4 (7.5)   | 12 (27.3) | 6 (9.2)   | 14 (20.0) | 38 (22.1)  |
|                          | Yes, but it should only be used to help brainstorm | 68 (16.3)  |           | 17 (32.1) | 5 (11.4)  | 8 (12.3)  | 10 (14.3) | 28 (16.3)  |
|                          | Yes, as long as its use is transparently disclosed | 259 (62.0) | 12 (85.7) | 28 (52.8) | 26 (59.1) | 46 (70.8) | 44 (62.9) | 103 (59.9) |
|                          | Yes, disclosure is NOT needed                      | 10 (2.4)   | 1 (7.1)   | 4 (7.5)   | 1 (2.3)   | 2 (3.1)   | 1 (1.4)   | 1 (0.6)    |
| <b>Healthcare, n (%)</b> | No, it should not be used at all                   | 15 (3.6)   |           | 1 (1.9)   | 1 (2.3)   | 1 (1.5)   | 5 (7.1)   | 7 (4.0)    |
|                          | I don't know, it is too early to make a statement  | 177 (42.2) | 1 (7.1)   | 15 (28.3) | 22 (50.0) | 25 (38.5) | 27 (38.6) | 87 (50.3)  |
|                          | Yes, it can be used for administrative purposes    | 176 (42.0) | 10 (71.4) | 25 (47.2) | 19 (43.2) | 27 (41.5) | 33 (47.1) | 62 (35.8)  |
|                          | Yes, it can be used for any purpose                | 51 (12.2)  | 3 (21.4)  | 12 (22.6) | 2 (4.5)   | 12 (18.5) | 5 (7.1)   | 17 (9.8)   |

*Survey delivered via Slido.*

**1. What's your current role?**

- Medical Student, Resident, Fellow
- Graduate Student, Postdoc Researcher
- Clinical Faculty
- Research Faculty
- Administrative Staff
- Other

**2. Have you used ChatGPT?**

- Yes
- No

**3. How interested are you in using ChatGPT in your day to day work?**

- To a Great Extent
- Somewhat
- Very Little
- Not at All

**4. Can ChatGPT be used in education?**

- No, it should be banned
- Yes, it should be actively incorporated
- I don't know, it is too early to make a statement

**5. Can ChatGPT be used for science?**

- No, it should not be used at all
- Yes, but it should only be used to help brainstorm
- Yes, as long as its use is transparently disclosed
- Yes, disclosure is NOT needed
- I don't know, it is too early to make a statement

**6. Can ChatGPT be used in healthcare?**

- No, it should not be used at all
- Yes, it can only be used to help write administrative content such as emails to insurance companies or to patients
- Yes, it can be used for any purpose
- I don't know, it is too early to make a statement

**7. Using one keyword, describe challenges of using ChatGPT**

**8. Using one keyword, describe benefits of using ChatGPT**
